# Supplementary material for: Reproducible segmentation of white matter hyperintensities using a new statistical definition
Source: PubMed Central journal article supplement (PMC5440501; doi:10.1007/s10334-016-0599-3), 2016-12-09

**Dice coefficients using different methods for detecting evidently normal brain.**

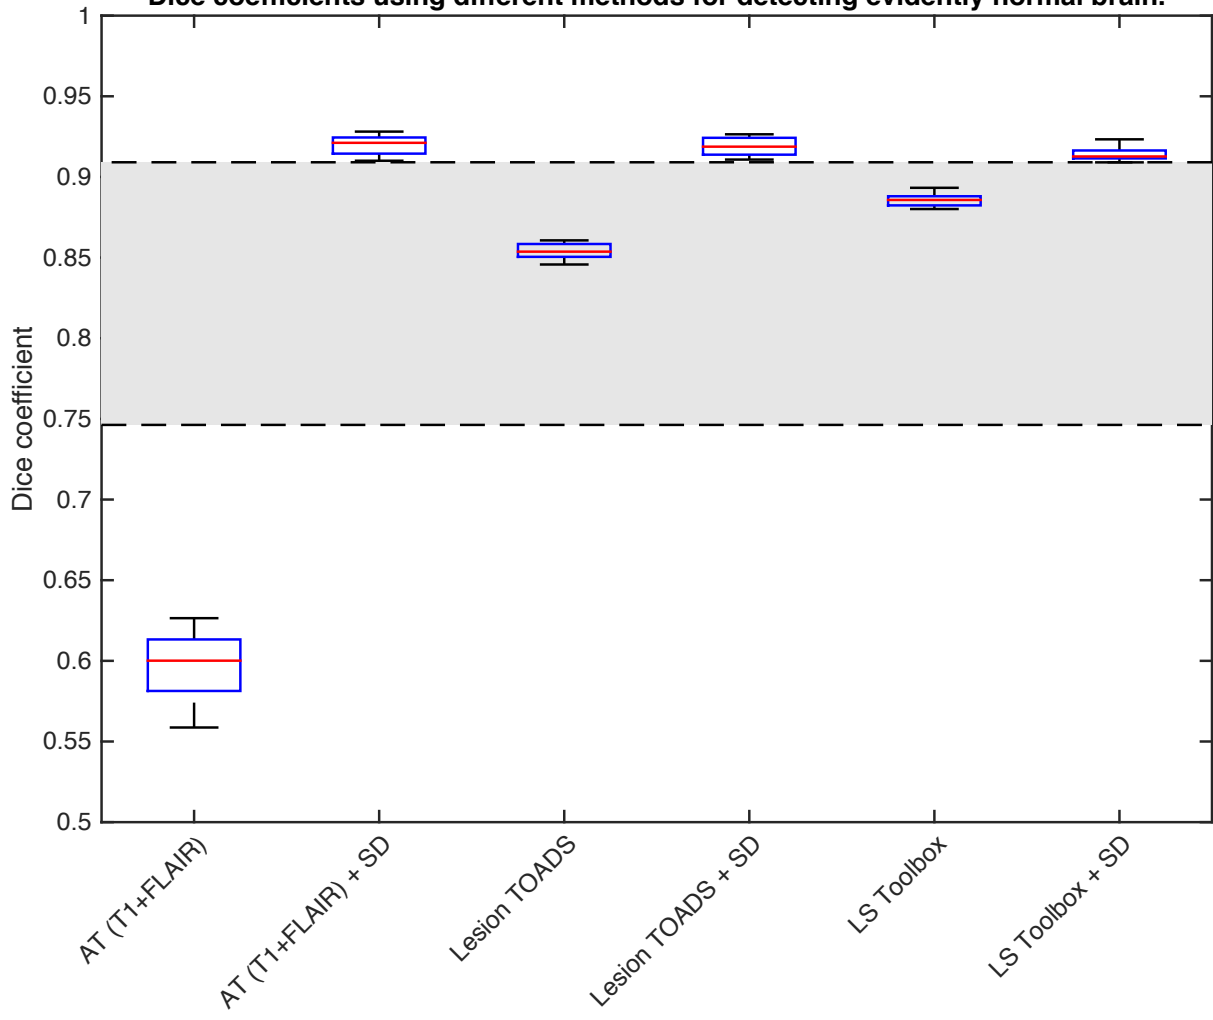

Supplement: 10334_2016_599_MOESM6_ESM.pdf [file 10334_2016_599_MOESM6_ESM.pdf]
