# Supplementary material for: Reproducible segmentation of white matter hyperintensities using a new statistical definition
Source: PubMed Central journal article supplement (PMC5440501; doi:10.1007/s10334-016-0599-3), 2016-12-09
Supplement: 10334_2016_599_MOESM7_ESM.pdf [file 10334_2016_599_MOESM7_ESM.pdf]

**Table S1** Different components of the approaches to the segmentation of WMH

| Approach                      | Input       | Segmentation Agent | Segmentation Target          | By product           |
|-------------------------------|-------------|--------------------|------------------------------|----------------------|
| Manual                        | MRI         | Human              | Compliance with<br>guideline | –                    |
| Supervised machine learning   | MRI + Human | Computer           | Similarity to manual         | Reproducibility      |
| Unsupervised machine learning | MRI         | Computer           | Similarity to manual         | Reproducibility      |
| Statistical definition        | MRI         | Computer           | Reproducibility              | Similarity to manual |
